# Supplementary material for: Alternate layer-by-layer assembly of graphene oxide nanosheets and fibrinogen nanofibers on a silicon substrate for a biomimetic three-dimensional hydroxyapatite scaffold
Source: Royal Society of Chemistry journal article supplement (doi:10.1039/c4tb01324g), 2014-09-08
Supplement: c4tb01324g1.pdf [file c4tb01324g1.pdf]

## Supporting Information

### Alternate layer-by-layer assembly of graphite oxide nanosheets and fibrinogen nanofibers on silicon substrate for biomimetic three-dimensional hydroxyapatite scaffold

Jinhui Wang,<sup>‡a</sup> Haixia Wang,<sup>‡a</sup> Yizhu Wang,<sup>a</sup> Jingfeng Li,<sup>b</sup> Zhiqiang Su<sup>\*a</sup> and Gang Wei<sup>\*b</sup>

<sup>a</sup> Beijing Key Laboratory on Preparation and Processing of Novel Polymeric Materials, Beijing University of Chemical Technology, 100029 Beijing, China.

<sup>b</sup> Faculty of Production Engineering, University of Bremen, D-28359 Bremen, Germany.

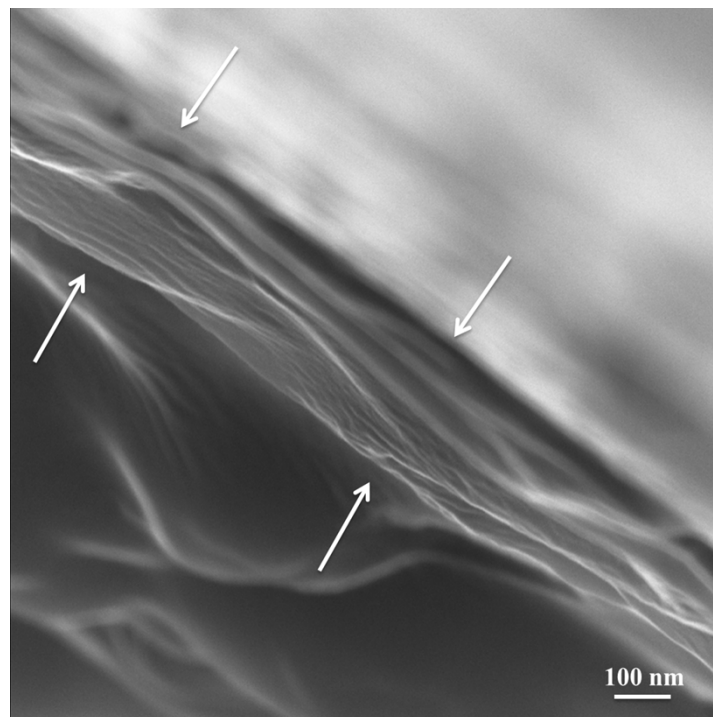

**Fig. S1** SEM image of the cross-section of the fabricated 3D (GO-NF)<sub>10</sub> scaffold.

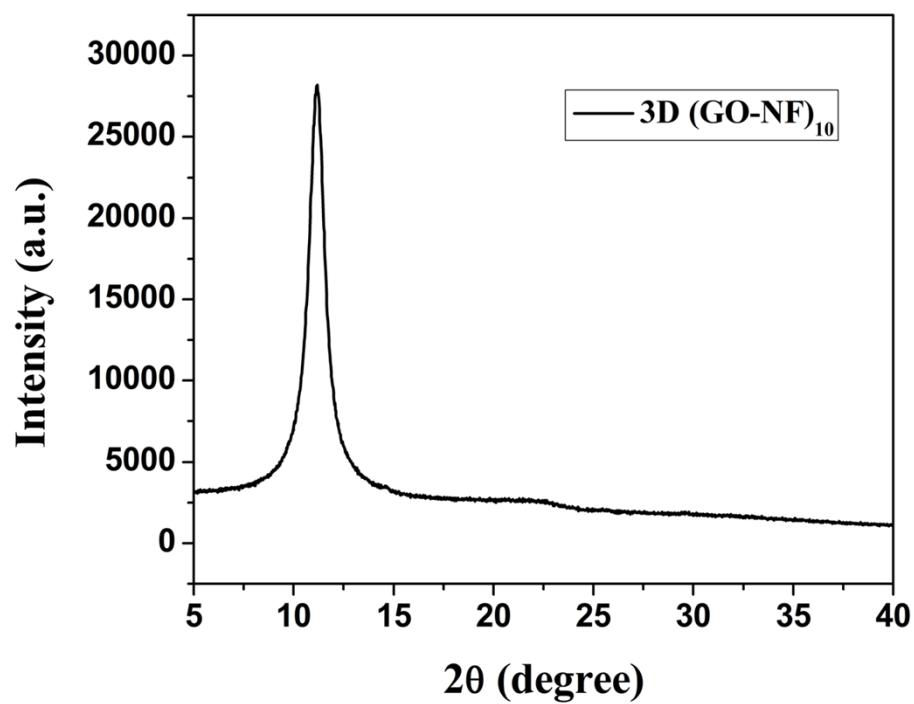

**Fig. S2** XRD pattern of the fabricated 3D (GO-NF)<sub>10</sub> scaffold.
